# Supplementary material
Source: PubMed Central journal article supplement (PMC1142359)

Tyr-Tub

Glu-Tub

Tyr-Tub

Glu-Tub

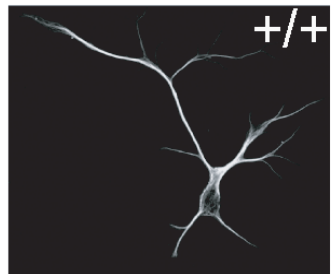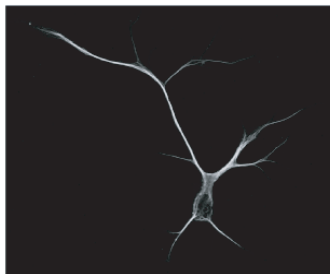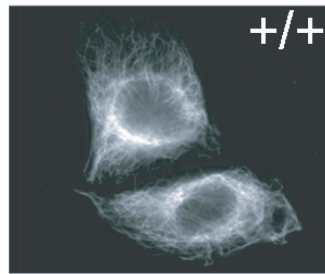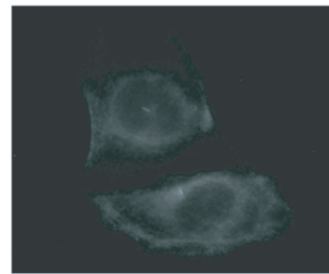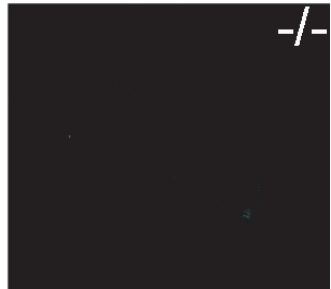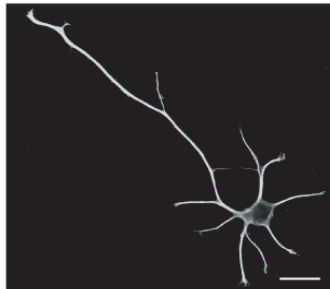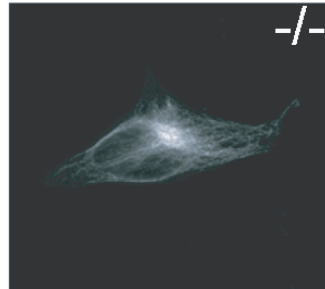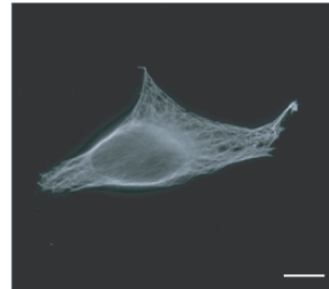

neurons

astrocytes

Supplement: pnas_0409626102v2_1.pdf [file pnas_0409626102v2_1.pdf]

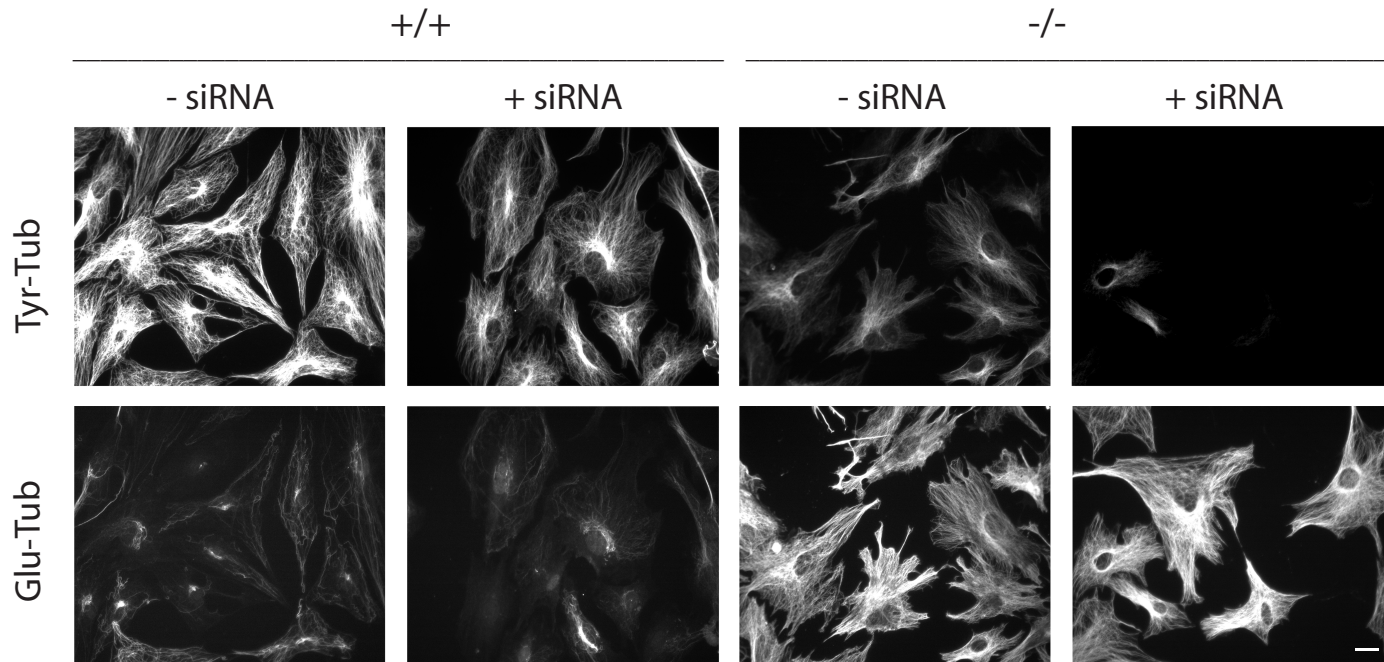

Supplement: pnas_0409626102v2_2.pdf [file pnas_0409626102v2_2.pdf]

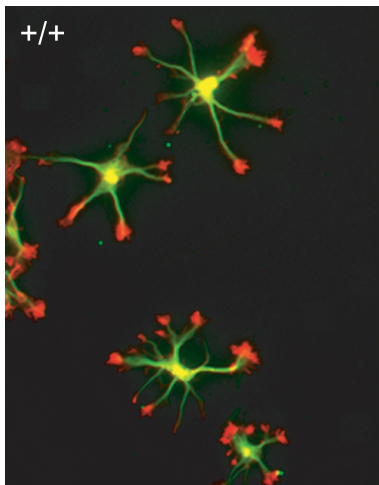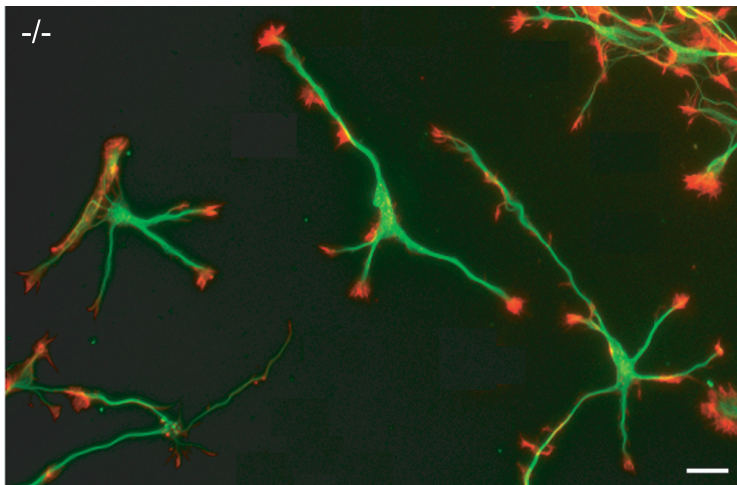

Supplement: pnas_0409626102v2_3.pdf [file pnas_0409626102v2_3.pdf]

$\alpha$ -Tub

EB1

$\alpha$ -Tub

CLIP 170

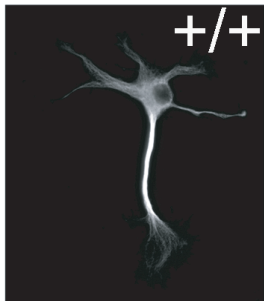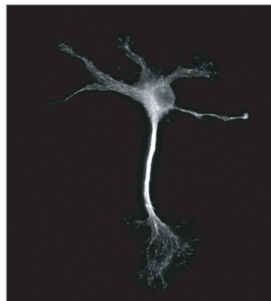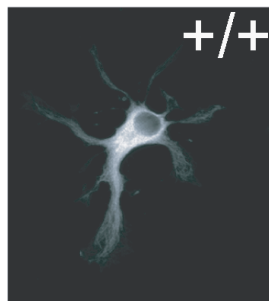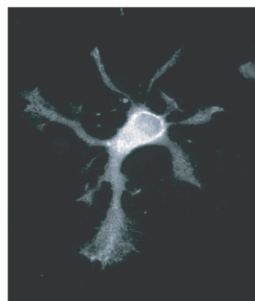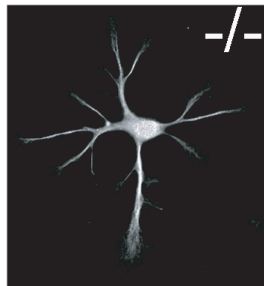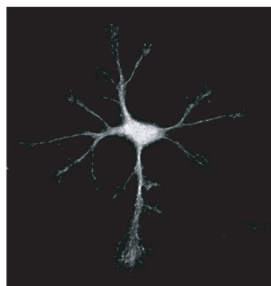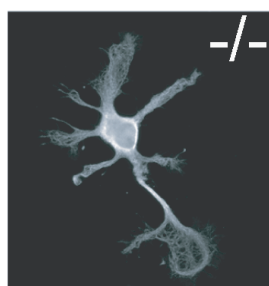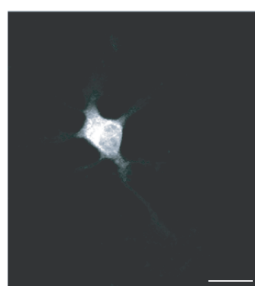

Supplement: pnas_0409626102v2_4.pdf [file pnas_0409626102v2_4.pdf]
